# Supplementary material
Source: PubMed Central journal article supplement (PMC4221431)
Supplement: NIHMS597305-supplement-13415_2014_290_MOESM1_ESM.pdf [file NIHMS597305-supplement-13415_2014_290_MOESM1_ESM.pdf]

## Supplementary Methods

Trials used in the current paper's analyses:

|                                               | 80% 1 <sup>st</sup><br>Fear | 80% 1 <sup>st</sup><br>Neutral | 50% 1 <sup>st</sup><br>Fear | 50% 1 <sup>st</sup><br>Neutral | 20% 1 <sup>st</sup><br>Fear | 20% 1 <sup>st</sup><br>Neutral |
|-----------------------------------------------|-----------------------------|--------------------------------|-----------------------------|--------------------------------|-----------------------------|--------------------------------|
| Total Number of Trials Presented              | 28                          | 30                             | 35                          | 37                             | 30                          | 29                             |
| Average Number of Trials Included in Analysis | 27±1.5 SD                   | 29±1.4 SD                      | 31±3.7 SD                   | 35±3.1 SD                      | 26±3.0 SD                   | 25±2.7 SD                      |

Trials not used in the current paper's analyses but were presented as part of the experiment:

|                        | 80% 1 <sup>st</sup><br>Fear | 80% 2 <sup>nd</sup><br>Fear | 80% 3 <sup>rd</sup><br>Fear | 80% 4+<br>Fear | 80% 1 <sup>st</sup><br>Neutral | 80% 2 <sup>nd</sup><br>Neutral | 80% 3 <sup>rd</sup><br>Neutral | 80% 4+<br>Neutral | 50% 1 <sup>st</sup><br>Fear | 50% 2 <sup>nd</sup><br>Fear | 50% 3 <sup>rd</sup><br>Fear | 50% 1 <sup>st</sup><br>Neutral | 50% 2 <sup>nd</sup><br>Neutral | 50% 3 <sup>rd</sup><br>Neutral | 20% 1 <sup>st</sup><br>Fear | 20% 1 <sup>st</sup><br>Neutral |
|------------------------|-----------------------------|-----------------------------|-----------------------------|----------------|--------------------------------|--------------------------------|--------------------------------|-------------------|-----------------------------|-----------------------------|-----------------------------|--------------------------------|--------------------------------|--------------------------------|-----------------------------|--------------------------------|
| Total Trials Presented | 28                          | 28                          | 23                          | 38             | 30                             | 24                             | 22                             | 41                | 35                          | 21                          | 11                          | 37                             | 23                             | 11                             | 30                          | 29                             |

**Table S1: Demographics of Subject Population**

All Subjects N = 24

---

|                                                                      |                 |
|----------------------------------------------------------------------|-----------------|
| Mean Reaction Times in milliseconds                                  |                 |
| 80% Fear                                                             | 820.10 ± 118.75 |
| 80% Neutral                                                          | 821.81 ± 103.10 |
| 50% Fear                                                             | 877.25 ± 135.01 |
| 50% Neutral                                                          | 871.84 ± 110.09 |
| 20% Fear                                                             | 899.95 ± 134.05 |
| 20% Neutral                                                          | 925.87 ± 126.92 |
| Age                                                                  | 27.8 ± 6.6      |
| Female:Male Ratio                                                    | 15:9            |
| Valence Bias Scores                                                  | 22.22 ± 204.11  |
| Mean Personality Measure Scores (N = number of subjects with scores) |                 |
| STAI (N = 24)                                                        |                 |
| Trait Anxiety                                                        | 32.2 ± 9.3      |
| State Anxiety                                                        | 28.6 ± 8.5      |
| NEO FFI (N=16)                                                       |                 |
| Neuroticism                                                          | 13.6 ± 8.0      |
| Extraversion                                                         | 32.4 ± 7.0      |
| Openness to Experience                                               | 33.7 ± 5.0      |
| Agreeableness                                                        | 32.4 ± 5.7      |
| Conscientiousness                                                    | 36.5 ± 5.6      |
| TPQ-HA (N=13)                                                        |                 |
| Harm Avoidance                                                       | 9.9 ± 5.9       |
| HA 1: Anticipatory worry & pessimism                                 | 2.8 ± 2.2       |
| HA 2: Fear of Uncertainty                                            | 3.5 ± 1.5       |
| HA 3: Shyness with strangers                                         | 1.8 ± 1.8       |
| HA 4: Fatigability & asthenia                                        | 1.8 ± 2.0       |
| Mean Percentage Correct                                              |                 |
| 80% Fear                                                             | 95 ± 5%         |
| 80% Neutral                                                          | 96 ± 5%         |
| 50% Fear                                                             | 91 ± 8%         |
| 50% Neutral                                                          | 95 ± 5%         |
| 20% Fear                                                             | 87 ± 10%        |
| 20% Neutral                                                          | 88 ± 9%         |

**Table S2: Group Main Effect of Expectation**

| <b>Expectation Main Effect for each timepoint individually</b>                |                                          |                                  |     |     |                  |                             |
|-------------------------------------------------------------------------------|------------------------------------------|----------------------------------|-----|-----|------------------|-----------------------------|
| Starting p value < 0.001, corrected to p<0.05 (17 voxels), p<0.01 (21 voxels) |                                          |                                  |     |     |                  |                             |
| Timepoint                                                                     | Anatomical Location                      | Peak Voxel Talairach Coordinates |     |     | Peak F-statistic | Number of Voxels in Cluster |
|                                                                               |                                          | x                                | y   | z   |                  |                             |
| 0-2 s post-cue                                                                | None                                     |                                  |     |     |                  |                             |
| 2-4 s post-cue                                                                | None                                     |                                  |     |     |                  |                             |
| 4-6 s post-cue (0-2 s post-face)                                              | None                                     |                                  |     |     |                  |                             |
| 6-8 s post-cue (2-4 s post-face)                                              | L Precentral Gyrus                       | -34                              | -22 | 50  | 12.32            | 36                          |
|                                                                               | L Medial Frontal Gyrus / SMA             | -7                               | -7  | 53  | 12.48            | 27                          |
|                                                                               | L Middle Frontal Gyrus                   | -22                              | -10 | 53  | 12.04            | 20*                         |
|                                                                               | R Lingual Gyrus                          | 23                               | -76 | -4  | 9.84             | 18*                         |
| 8-10 s post-cue (4-6 s post-face)                                             | L IPL / Postcentral Gyrus                | -28                              | -19 | 32  | 17.27            | 71                          |
|                                                                               | L Medial Frontal Gyrus / SMA             | -7                               | -7  | 56  | 16.14            | 29                          |
|                                                                               | L Middle Cingulate                       | -4                               | -25 | 29  | 16.39            | 28                          |
|                                                                               | L Precentral Gyrus                       | -40                              | -16 | 53  | 12.78            | 28                          |
|                                                                               | R Middle Temporal Gyrus                  | 53                               | -22 | -10 | 13.98            | 25                          |
|                                                                               | L Anterior Insula                        | -31                              | 20  | 5   | 10.18            | 23                          |
|                                                                               | L Thalamus                               | -16                              | -22 | 11  | 15.17            | 22                          |
| 10-12 s post-cue (6-8 s post-face)                                            | L Insula (including Caudate and Putamen) | -40                              | -4  | 14  | 21.69            | 199                         |
|                                                                               | L Thalamus                               | -16                              | -22 | 11  | 24.89            | 62                          |
|                                                                               | R Caudate and Putamen                    | 17                               | 5   | 14  | 13.51            | 58                          |
|                                                                               | R Sup Temporal Gyrus                     | 59                               | -55 | 17  | 13.49            | 35                          |
|                                                                               | L Medial Frontal Gyrus (SMA)             | -7                               | -7  | 53  | 15.96            | 35                          |
|                                                                               | L Postcentral Gyrus/ IPL                 | -52                              | -22 | 23  | 15.03            | 31                          |
|                                                                               | R Anterior Insula                        | 44                               | 17  | 8   | 12.52            | 29                          |
|                                                                               | R Inferior Frontal Gyrus                 | 59                               | 8   | 23  | 14.88            | 29                          |
|                                                                               | L Middle Cingulate                       | -4                               | -25 | 29  | 11.55            | 23                          |
|                                                                               | L Postcentral Gyrus/ IPL                 | -40                              | -28 | 44  | 9.55             | 17*                         |
|                                                                               | 12-14 s post-cue (8-10 s post-face)      | L Putamen                        | -19 | 5   | 8                | 23.93                       |
| L Thalamus                                                                    |                                          | -16                              | -19 | 11  | 22.87            |                             |
| R Caudate                                                                     |                                          | 14                               | 5   | 14  | 19.15            |                             |
| L Anterior Insula                                                             |                                          | -37                              | 20  | 5   | 19.42            | 45                          |
| L Medial Frontal Gyrus/SMA                                                    |                                          | -7                               | -10 | 50  | 13.85            | 36                          |
| L Superior Frontal Gyrus                                                      |                                          | -25                              | 35  | 32  | 11.33            | 28                          |
| R Middle Temporal Gyrus                                                       |                                          | 53                               | -22 | -13 | 14.83            | 25                          |
| L IPL                                                                         |                                          | -40                              | -49 | 44  | 12.08            | 24                          |
| L Cingulate/SMA                                                               |                                          | -1                               | -1  | 44  | 10.53            | 17*                         |
| 14-16 s post-cue (10-12 s post-face)                                          | L Caudate/Thalamus                       | -7                               | -1  | 11  | 12.25            | 65                          |
|                                                                               | R Caudate/Thalamus                       | 8                                | -1  | 11  | 12.99            | 56                          |

**Table S3: Behavior and Personality Assessment Correlations**

Values in bold are significant at  $p < 0.05$  corrected for multiple comparisons

<sup>1</sup>R values found in these cells were calculated with data from sixteen subjects

|                                     | Valence Bias | STAI State Anxiety | STAI Trait Anxiety | NEO-FFI Neuroticism <sup>1</sup> | NEO-FFI Extraversion <sup>1</sup> | NEO-FFI Openness to Experience <sup>1</sup> | NEO-FFI Agreeableness <sup>1</sup> | NEO-FFI Conscientiousness <sup>1</sup> | Harm Avoidance <sup>2</sup> | HA1 <sup>2</sup> | HA2 <sup>2</sup> | HA3 <sup>2</sup> | HA4 <sup>2</sup> |
|-------------------------------------|--------------|--------------------|--------------------|----------------------------------|-----------------------------------|---------------------------------------------|------------------------------------|----------------------------------------|-----------------------------|------------------|------------------|------------------|------------------|
| Valence Bias                        | <b>x</b>     |                    |                    |                                  |                                   |                                             |                                    |                                        |                             |                  |                  |                  |                  |
| State Anxiety                       | 0.32         | <b>x</b>           |                    |                                  |                                   |                                             |                                    |                                        |                             |                  |                  |                  |                  |
| Trait Anxiety                       | 0.20         | 0.75               | <b>X</b>           |                                  |                                   |                                             |                                    |                                        |                             |                  |                  |                  |                  |
| Neuroticism <sup>1</sup>            | 0.45         | 0.70               | <b>0.91</b>        | <b>X</b>                         |                                   |                                             |                                    |                                        |                             |                  |                  |                  |                  |
| Extraversion <sup>1</sup>           | -0.38        | -0.59              | -0.75              | -0.78                            | <b>x</b>                          |                                             |                                    |                                        |                             |                  |                  |                  |                  |
| Openness to Experience <sup>1</sup> | 0.33         | 0.42               | 0.26               | 0.42                             | -0.32                             | <b>x</b>                                    |                                    |                                        |                             |                  |                  |                  |                  |
| Agreeableness <sup>1</sup>          | -0.03        | -0.32              | -0.18              | -0.08                            | 0.48                              | -0.03                                       | <b>X</b>                           |                                        |                             |                  |                  |                  |                  |
| Conscientiousness <sup>1</sup>      | -0.12        | -0.53              | -0.58              | -0.55                            | 0.38                              | -0.19                                       | 0.24                               | <b>X</b>                               |                             |                  |                  |                  |                  |
| Harm Avoidance <sup>2</sup>         | <b>0.79</b>  | <b>0.84</b>        | <b>0.85</b>        | <b>0.85</b>                      | <b>-0.83</b>                      | 0.48                                        | -0.19                              | -0.46                                  | <b>x</b>                    |                  |                  |                  |                  |
| HA1 <sup>2</sup>                    | 0.55         | 0.60               | <b>0.79</b>        | <b>0.82</b>                      | -0.70                             | 0.59                                        | -0.04                              | -0.35                                  | <b>x</b>                    | <b>x</b>         |                  |                  |                  |
| HA2 <sup>2</sup>                    | <b>0.84</b>  | 0.54               | 0.47               | 0.56                             | -0.60                             | 0.44                                        | -0.01                              | -0.02                                  | <b>x</b>                    | 0.73             | <b>X</b>         |                  |                  |
| HA3 <sup>2</sup>                    | 0.43         | <b>0.83</b>        | <b>0.85</b>        | 0.78                             | -0.77                             | 0.33                                        | -0.27                              | -0.73                                  | <b>x</b>                    | 0.61             | 0.38             | <b>x</b>         |                  |
| HA4 <sup>2</sup>                    | 0.70         | 0.68               | 0.53               | 0.50                             | -0.55                             | 0.16                                        | -0.27                              | -0.33                                  | <b>x</b>                    | 0.28             | 0.50             | 0.50             | <b>x</b>         |

<sup>2</sup>R values found in these cells were calculated with data from thirteen subjects

STAI : Spielberger State and Trait Anxiety, NEO-FFI : Neuroticism Extraversion Openness to Experience Five Factor Inventory

Harm Avoidance Subscales:

HA1: Anticipatory worry

HA2: Fear of uncertainty

HA3: Shyness/Shyness with strangers

HA4: Fatigability/Fatigability and asthenia

**Table S4: Demographics by Valence Bias Group**

| Demographics by Valence Bias Group                                   |                                  |                                 |
|----------------------------------------------------------------------|----------------------------------|---------------------------------|
|                                                                      | Fear Fast Responders<br>(N = 15) | Fear Slow Responders<br>(N = 9) |
| Mean Reaction Times in milliseconds                                  |                                  |                                 |
| 80% Fear                                                             | 775.45 ± 97.46                   | 894.53 ± 118.12**               |
| 80% Neutral                                                          | 815.18 ± 97.09                   | 832.86 ± 117.66                 |
| 50% Fear                                                             | 817.54 ± 106.67                  | 976.76 ± 121.11**               |
| 50% Neutral                                                          | 865.07 ± 119.07                  | 883.13 ± 99.01                  |
| 20% Fear                                                             | 848.87 ± 108.10                  | 985.09 ± 134.78**               |
| 20% Neutral                                                          | 913.23 ± 145.33                  | 946.94 ± 92.49                  |
| Age                                                                  | 27.9 ± 8.1                       | 27.4 ± 3.1                      |
| Female:Male Ratio                                                    | 10:5                             | 5:4                             |
| Valence Bias Scores                                                  | 151.63 ± 118.66                  | -193.46 ± 106.80                |
| Mean Personality Measure Scores (N = number of subjects with scores) |                                  |                                 |
| STAI (N = 24)                                                        |                                  |                                 |
| Trait Anxiety                                                        | 32.4 ± 9.8 (N = 15)              | 31.8 ± 8.8 (N = 9)              |
| State Anxiety                                                        | 29.5 ± 9.3                       | 27.1 ± 7.3                      |
| NEO FFI (N = 16)                                                     |                                  |                                 |
| Neuroticism                                                          | 15.3 ± 9.1 (N = 10)              | 10.8 ± 5.2 (N = 6)              |
| Extraversion                                                         | 31.3 ± 6.2                       | 34.3 ± 8.4                      |
| Openness to Experience                                               | 34.7 ± 4.9                       | 32.0 ± 5.2                      |
| Agreeableness                                                        | 31.5 ± 5.9                       | 33.8 ± 5.6                      |
| Conscientiousness                                                    | 36.4 ± 6.2                       | 36.7 ± 5.0                      |
| TPQ-HA (N = 13)                                                      |                                  |                                 |
| Harm Avoidance                                                       | 11.9 ± 5.8 (N = 8)               | 5.5 ± 3.7 (N = 5)               |
| HA 1: Anticipatory worry & pessimism                                 | 3.2 ± 2.3                        | 2.0 ± 1.8                       |
| HA 2: Fear of Uncertainty                                            | 4.1 ± 0.9                        | 2.0 ± 1.6**                     |
| HA 3: Shyness with strangers                                         | 1.9 ± 2.1                        | 1.5 ± 1.0                       |
| HA 4: Fatigability & asthenia                                        | 2.7 ± 1.9                        | 0 ± 0.0*                        |
| Mean Percentage Correct                                              |                                  |                                 |
| 80% Fear                                                             | 96 ± 5%                          | 93 ± 5%                         |
| 80% Neutral                                                          | 97 ± 5%                          | 94 ± 4%                         |
| 50% Fear                                                             | 91 ± 9%                          | 90 ± 7%                         |
| 50% Neutral                                                          | 95 ± 5%                          | 96 ± 4%                         |
| 20% Fear                                                             | 86 ± 11%                         | 89 ± 9%                         |
| 20% Neutral                                                          | 87 ± 11%                         | 89 ± 8%                         |

\* p < 0.05 \*\* p < 0.01, t-test uncorrected
